# Supplementary material
Source: publisher figshare collection journal article supplement (https://acs.figshare.com/ndownloader/files/5701728)
Supplement: Supplementary file 1 [file 5701728]

  
data_3042a 
  
_audit_creation_method            SHELXL-97 
_chemical_name_systematic 
; 
 ? 
; 
_chemical_name_common             ? 
_chemical_melting_point           ? 
_chemical_formula_moiety          ? 
_chemical_formula_sum 
 'C38.60 H32.70 Br1.10 Cl2 Fe P2 Pt S0.90' 
_chemical_formula_weight          997.08 
  
loop_ 
 _atom_type_symbol 
 _atom_type_description 
 _atom_type_scat_dispersion_real 
 _atom_type_scat_dispersion_imag 
 _atom_type_scat_source 
 'C'  'C'   0.0033   0.0016 
 'International Tables Vol C Tables 4.2.6.8 and 6.1.1.4' 
 'H'  'H'   0.0000   0.0000 
 'International Tables Vol C Tables 4.2.6.8 and 6.1.1.4' 
 'P'  'P'   0.1023   0.0942 
 'International Tables Vol C Tables 4.2.6.8 and 6.1.1.4' 
 'S'  'S'   0.1246   0.1234 
 'International Tables Vol C Tables 4.2.6.8 and 6.1.1.4' 
 'Br'  'Br'  -0.2901   2.4595 
 'International Tables Vol C Tables 4.2.6.8 and 6.1.1.4' 
 'Pt'  'Pt'  -1.7033   8.3905 
 'International Tables Vol C Tables 4.2.6.8 and 6.1.1.4' 
 'Cl'  'Cl'   0.1484   0.1585 
 'International Tables Vol C Tables 4.2.6.8 and 6.1.1.4' 
 'Fe'  'Fe'   0.3463   0.8444 
 'International Tables Vol C Tables 4.2.6.8 and 6.1.1.4' 
  
_symmetry_cell_setting            Monoclinic 
_symmetry_space_group_name_H-M    P2(1)/c 
  
loop_ 
 _symmetry_equiv_pos_as_xyz 
 'x, y, z' 
 '-x, y+1/2, -z+1/2' 
 '-x, -y, -z' 
 'x, -y-1/2, z-1/2' 
  
_cell_length_a                    22.8672(13) 
_cell_length_b                    9.4384(5) 
_cell_length_c                    16.4891(10) 
_cell_angle_alpha                 90.00 
_cell_angle_beta                  104.6670(10) 
_cell_angle_gamma                 90.00 
_cell_volume                      3442.9(3) 
_cell_formula_units_Z             4 
_cell_measurement_temperature     223(2) 
_cell_measurement_reflns_used     3674 
_cell_measurement_theta_min       2.35 
_cell_measurement_theta_max       25.13 
  
_exptl_crystal_description        needle 
_exptl_crystal_colour             yellow 
_exptl_crystal_size_max           0.36 
_exptl_crystal_size_mid           0.10 
_exptl_crystal_size_min           0.08 
_exptl_crystal_density_meas       0 
_exptl_crystal_density_diffrn     1.924 
_exptl_crystal_density_method     'not measured' 
_exptl_crystal_F_000              1941 
_exptl_absorpt_coefficient_mu     6.089 
_exptl_absorpt_correction_type    'Sadabs, (Sheldrick 2001)' 
_exptl_absorpt_correction_T_min   0.2179 
_exptl_absorpt_correction_T_max   0.6415 
_exptl_absorpt_process_details    ? 
  
_exptl_special_details 
; 
 ? 
; 
  
_diffrn_ambient_temperature       223(2) 
_diffrn_radiation_wavelength      0.71073 
_diffrn_radiation_type            MoK\a 
_diffrn_radiation_source          'fine-focus sealed tube' 
_diffrn_radiation_monochromator   graphite 
_diffrn_measurement_device_type   'CCD area detector' 
_diffrn_measurement_method        'phi and omega scans' 
_diffrn_detector_area_resol_mean  ? 
_diffrn_standards_number          ? 
_diffrn_standards_interval_count  ? 
_diffrn_standards_interval_time   ? 
_diffrn_standards_decay_%         ? 
_diffrn_reflns_number             19310 
_diffrn_reflns_av_R_equivalents   0.0486 
_diffrn_reflns_av_sigmaI/netI     0.0531 
_diffrn_reflns_limit_h_min        -27 
_diffrn_reflns_limit_h_max        27 
_diffrn_reflns_limit_k_min        -11 
_diffrn_reflns_limit_k_max        11 
_diffrn_reflns_limit_l_min        -12 
_diffrn_reflns_limit_l_max        19 
_diffrn_reflns_theta_min          1.84 
_diffrn_reflns_theta_max          25.00 
_reflns_number_total              6055 
_reflns_number_gt                 5076 
_reflns_threshold_expression      >2sigma(I) 
  
_computing_data_collection        'Bruker SMART' 
_computing_cell_refinement        'Bruker SMART' 
_computing_data_reduction         'Bruker SAINT' 
_computing_structure_solution     'SHELXS-97 (Sheldrick, 1990)' 
_computing_structure_refinement   'SHELXL-97 (Sheldrick, 1997)' 
_computing_molecular_graphics     'Bruker SHELXTL' 
_computing_publication_material   'Bruker SHELXTL' 
  
_refine_special_details 
; 
 Refinement of F^2^ against ALL reflections.  The weighted R-factor wR and 
 goodness of fit S are based on F^2^, conventional R-factors R are based 
 on F, with F set to zero for negative F^2^. The threshold expression of 
 F^2^ > 2sigma(F^2^) is used only for calculating R-factors(gt) etc. and is 
 not relevant to the choice of reflections for refinement.  R-factors based 
 on F^2^ are statistically about twice as large as those based on F, and R- 
 factors based on ALL data will be even larger. 
; 
  
_refine_ls_structure_factor_coef  Fsqd 
_refine_ls_matrix_type            full 
_refine_ls_weighting_scheme       calc 
_refine_ls_weighting_details 
 'calc w=1/[\s^2^(Fo^2^)+(0.0602P)^2^+24.6651P] where P=(Fo^2^+2Fc^2^)/3' 
_atom_sites_solution_primary      direct 
_atom_sites_solution_secondary    difmap 
_atom_sites_solution_hydrogens    geom 
_refine_ls_hydrogen_treatment     mixed 
_refine_ls_extinction_method      none 
_refine_ls_extinction_coef        ? 
_refine_ls_number_reflns          6055 
_refine_ls_number_parameters      417 
_refine_ls_number_restraints      7 
_refine_ls_R_factor_all           0.0623 
_refine_ls_R_factor_gt            0.0505 
_refine_ls_wR_factor_ref          0.1301 
_refine_ls_wR_factor_gt           0.1244 
_refine_ls_goodness_of_fit_ref    1.086 
_refine_ls_restrained_S_all       1.086 
_refine_ls_shift/su_max           0.001 
_refine_ls_shift/su_mean          0.000 
  
loop_ 
 _atom_site_label 
 _atom_site_type_symbol 
 _atom_site_fract_x 
 _atom_site_fract_y 
 _atom_site_fract_z 
 _atom_site_U_iso_or_equiv 
 _atom_site_adp_type 
 _atom_site_occupancy 
 _atom_site_symmetry_multiplicity 
 _atom_site_calc_flag 
 _atom_site_refinement_flags 
 _atom_site_disorder_assembly 
 _atom_site_disorder_group 
Pt1 Pt -0.262064(15) 1.94842(3) -0.24751(2) 0.01966(12) Uani 1 1 d . A 1 
Fe1 Fe -0.26747(6) 2.07689(12) -0.49903(8) 0.0215(3) Uani 1 1 d . A 1 
P1 P -0.34603(10) 1.9708(2) -0.36167(14) 0.0196(5) Uani 1 1 d . A 1 
P2 P -0.19384(10) 2.0739(2) -0.29361(14) 0.0205(5) Uani 1 1 d . A 1 
Br1 Br -0.32905(5) 1.80647(12) -0.18287(7) 0.0425(3) Uani 1 1 d . A 1 
S1 S -0.20605(16) 1.9946(4) -0.0506(2) 0.0509(9) Uani 0.90 1 d P A 1 
C1 C -0.1970(4) 1.9093(10) -0.1392(7) 0.019(2) Uani 0.90 1 d PU A 1 
C2 C -0.1472(5) 1.8266(10) -0.1179(6) 0.029(2) Uani 0.90 1 d P A 1 
H2A H -0.1337 1.7713 -0.1569 0.035 Uiso 0.90 1 calc PR A 1 
C3 C -0.1175(6) 1.8303(13) -0.0323(8) 0.045(3) Uani 0.90 1 d P A 1 
H3A H -0.0827 1.7764 -0.0090 0.053 Uiso 0.90 1 calc PR A 1 
C4 C -0.1429(6) 1.9175(15) 0.0137(7) 0.053(4) Uani 0.90 1 d P A 1 
H4A H -0.1285 1.9336 0.0716 0.064 Uiso 0.90 1 calc PR A 1 
C5 C -0.3427(4) 2.0551(8) -0.4590(5) 0.0215(18) Uani 1 1 d . A 1 
C6 C -0.3523(4) 1.9927(10) -0.5414(5) 0.026(2) Uani 1 1 d . A 1 
H6A H -0.3623 1.8925 -0.5565 0.031 Uiso 1 1 calc R A 1 
C7 C -0.3435(4) 2.1001(11) -0.5954(6) 0.031(2) Uani 1 1 d . A 1 
H7A H -0.3454 2.0879 -0.6557 0.037 Uiso 1 1 calc R A 1 
C8 C -0.3299(4) 2.2292(10) -0.5496(6) 0.029(2) Uani 1 1 d . A 1 
H8A H -0.3213 2.3215 -0.5726 0.035 Uiso 1 1 calc R A 1 
C9 C -0.3294(4) 2.2013(9) -0.4656(5) 0.0227(19) Uani 1 1 d . A 1 
H9A H -0.3212 2.2711 -0.4193 0.027 Uiso 1 1 calc R A 1 
C10 C -0.1955(4) 2.0538(9) -0.4032(6) 0.0237(19) Uani 1 1 d . A 1 
C11 C -0.1832(4) 2.1582(11) -0.4582(6) 0.029(2) Uani 1 1 d . A 1 
H11A H -0.1731 2.2587 -0.4440 0.035 Uiso 1 1 calc R A 1 
C12 C -0.1885(4) 2.0945(12) -0.5370(6) 0.037(2) Uani 1 1 d . A 1 
H12A H -0.1838 2.1427 -0.5883 0.044 Uiso 1 1 calc R A 1 
C13 C -0.2042(5) 1.9517(10) -0.5307(7) 0.035(2) Uani 1 1 d . A 1 
H13A H -0.2122 1.8821 -0.5771 0.042 Uiso 1 1 calc R A 1 
C14 C -0.2070(4) 1.9241(10) -0.4498(6) 0.029(2) Uani 1 1 d . A 1 
H14A H -0.2164 1.8314 -0.4279 0.035 Uiso 1 1 calc R A 1 
C1A C -0.3772(4) 1.7960(9) -0.3952(5) 0.0233(19) Uani 1 1 d . A 1 
C2A C -0.3455(4) 1.7070(9) -0.4354(6) 0.031(2) Uani 1 1 d . A 1 
H2AA H -0.3097 1.7383 -0.4477 0.038 Uiso 1 1 calc R A 1 
C3A C -0.3669(5) 1.5710(10) -0.4576(7) 0.042(3) Uani 1 1 d . A 1 
H3AA H -0.3457 1.5111 -0.4858 0.050 Uiso 1 1 calc R A 1 
C4A C -0.4176(5) 1.5238(10) -0.4392(7) 0.044(3) Uani 1 1 d . A 1 
H4AA H -0.4315 1.4316 -0.4547 0.052 Uiso 1 1 calc R A 1 
C5A C -0.4491(5) 1.6094(11) -0.3981(7) 0.041(3) Uani 1 1 d . A 1 
H5AA H -0.4837 1.5746 -0.3838 0.049 Uiso 1 1 calc R A 1 
C6A C -0.4299(4) 1.7470(10) -0.3775(6) 0.033(2) Uani 1 1 d . A 1 
H6AA H -0.4526 1.8071 -0.3516 0.039 Uiso 1 1 calc R A 1 
C1B C -0.4083(4) 2.0742(8) -0.3398(6) 0.0222(19) Uani 1 1 d . A 1 
C2B C -0.4577(4) 2.1102(10) -0.4056(6) 0.027(2) Uani 1 1 d . A 1 
H2BA H -0.4597 2.0775 -0.4601 0.032 Uiso 1 1 calc R A 1 
C3B C -0.5031(4) 2.1928(11) -0.3912(6) 0.034(2) Uani 1 1 d . A 1 
H3BA H -0.5361 2.2168 -0.4359 0.040 Uiso 1 1 calc R A 1 
C4B C -0.5009(4) 2.2412(11) -0.3117(6) 0.038(2) Uani 1 1 d . A 1 
H4BA H -0.5325 2.2969 -0.3021 0.045 Uiso 1 1 calc R A 1 
C5B C -0.4518(5) 2.2075(12) -0.2458(6) 0.039(3) Uani 1 1 d . A 1 
H5BA H -0.4498 2.2425 -0.1918 0.047 Uiso 1 1 calc R A 1 
C6B C -0.4057(4) 2.1225(10) -0.2592(6) 0.028(2) Uani 1 1 d . A 1 
H6BA H -0.3730 2.0976 -0.2142 0.034 Uiso 1 1 calc R A 1 
C1C C -0.1153(4) 2.0323(10) -0.2441(6) 0.031(2) Uani 1 1 d . A 1 
C2C C -0.0850(5) 1.9317(15) -0.2792(8) 0.062(4) Uani 1 1 d . A 1 
H2CA H -0.1040 1.8932 -0.3318 0.074 Uiso 1 1 calc R A 1 
C3C C -0.0268(6) 1.886(2) -0.2379(9) 0.097(6) Uani 1 1 d . A 1 
H3CA H -0.0077 1.8129 -0.2604 0.116 Uiso 1 1 calc R A 1 
C4C C 0.0013(6) 1.949(2) -0.1652(10) 0.089(6) Uani 1 1 d . A 1 
H4CA H 0.0411 1.9223 -0.1384 0.106 Uiso 1 1 calc R A 1 
C5C C -0.0278(6) 2.0538(15) -0.1282(8) 0.065(4) Uani 1 1 d . A 1 
H5CA H -0.0076 2.0963 -0.0772 0.077 Uiso 1 1 calc R A 1 
C6C C -0.0867(5) 2.0936(12) -0.1682(6) 0.039(3) Uani 1 1 d . A 1 
H6CA H -0.1069 2.1616 -0.1437 0.047 Uiso 1 1 calc R A 1 
C1D C -0.1994(4) 2.2641(9) -0.2795(5) 0.0222(19) Uani 1 1 d . A 1 
C2D C -0.1519(5) 2.3533(10) -0.2810(6) 0.036(2) Uani 1 1 d . A 1 
H2DA H -0.1151 2.3151 -0.2866 0.043 Uiso 1 1 calc R A 1 
C3D C -0.1578(5) 2.4983(11) -0.2744(7) 0.043(3) Uani 1 1 d . A 1 
H3DA H -0.1252 2.5589 -0.2749 0.052 Uiso 1 1 calc R A 1 
C4D C -0.2120(6) 2.5525(11) -0.2671(7) 0.046(3) Uani 1 1 d . A 1 
H4DA H -0.2165 2.6513 -0.2647 0.055 Uiso 1 1 calc R A 1 
C5D C -0.2592(5) 2.4675(11) -0.2633(6) 0.036(2) Uani 1 1 d . A 1 
H5DA H -0.2958 2.5068 -0.2580 0.043 Uiso 1 1 calc R A 1 
C6D C -0.2523(4) 2.3203(9) -0.2673(5) 0.0235(19) Uani 1 1 d . A 1 
H6DA H -0.2837 2.2598 -0.2617 0.028 Uiso 1 1 calc R A 1 
Br1X Br -0.1997(5) 1.9607(14) -0.1016(10) 0.040(3) Uiso 0.10 1 d P A 1 
C1S C -0.0341(16) 1.505(4) 0.0274(14) 0.195(13) Uiso 1 1 d D B -1 
H1S1 H -0.0718 1.5494 0.0323 0.234 Uiso 1 1 calc R B -1 
H1S2 H 0.0005 1.5669 0.0505 0.234 Uiso 1 1 calc R B -1 
Cl1 Cl -0.0371(5) 1.4428(13) -0.0779(8) 0.252(4) Uani 1 1 d D B -1 
Cl2 Cl -0.0240(5) 1.3247(14) 0.0700(7) 0.252(4) Uani 1 1 d D B -1 
  
loop_ 
 _atom_site_aniso_label 
 _atom_site_aniso_U_11 
 _atom_site_aniso_U_22 
 _atom_site_aniso_U_33 
 _atom_site_aniso_U_23 
 _atom_site_aniso_U_13 
 _atom_site_aniso_U_12 
Pt1 0.01789(19) 0.01968(18) 0.01945(19) 0.00175(14) 0.00108(13) -0.00132(13) 
Fe1 0.0225(7) 0.0221(6) 0.0198(6) -0.0020(5) 0.0054(5) 0.0009(5) 
P1 0.0174(11) 0.0183(11) 0.0218(11) -0.0027(9) 0.0026(9) -0.0008(9) 
P2 0.0157(11) 0.0223(11) 0.0217(11) 0.0014(9) 0.0016(9) 0.0011(9) 
Br1 0.0361(6) 0.0503(6) 0.0393(6) 0.0123(5) 0.0061(5) -0.0083(5) 
S1 0.051(2) 0.062(2) 0.0374(19) -0.0192(17) 0.0083(16) 0.0039(17) 
C1 0.016(5) 0.018(4) 0.024(5) -0.009(4) 0.008(4) 0.003(4) 
C2 0.033(6) 0.022(5) 0.027(5) 0.006(4) -0.005(5) -0.009(4) 
C3 0.034(7) 0.043(7) 0.047(7) 0.016(6) -0.008(6) -0.009(6) 
C4 0.059(9) 0.069(9) 0.016(6) -0.004(6) -0.017(6) -0.012(7) 
C5 0.023(5) 0.020(4) 0.021(4) 0.001(4) 0.003(4) 0.007(4) 
C6 0.032(5) 0.026(4) 0.019(4) -0.009(4) 0.006(4) 0.004(4) 
C7 0.028(5) 0.045(5) 0.020(5) -0.001(4) 0.006(4) 0.006(4) 
C8 0.034(5) 0.026(5) 0.025(5) 0.005(4) 0.005(4) 0.004(4) 
C9 0.019(5) 0.026(4) 0.024(5) 0.000(4) 0.005(4) 0.004(4) 
C10 0.014(4) 0.027(5) 0.029(5) -0.006(4) 0.004(4) 0.003(4) 
C11 0.020(5) 0.038(5) 0.030(5) 0.005(4) 0.006(4) -0.003(4) 
C12 0.024(5) 0.059(7) 0.026(5) 0.001(5) 0.005(4) 0.000(5) 
C13 0.031(6) 0.036(5) 0.037(6) -0.007(5) 0.007(5) 0.012(4) 
C14 0.025(5) 0.027(5) 0.035(5) -0.005(4) 0.007(4) 0.004(4) 
C1A 0.024(5) 0.020(4) 0.024(5) -0.001(4) 0.001(4) -0.005(4) 
C2A 0.029(5) 0.024(5) 0.041(6) -0.002(4) 0.007(5) 0.002(4) 
C3A 0.044(7) 0.025(5) 0.059(7) -0.011(5) 0.018(6) -0.002(5) 
C4A 0.060(8) 0.011(4) 0.055(7) -0.009(4) 0.005(6) -0.010(4) 
C5A 0.039(6) 0.039(6) 0.045(6) 0.003(5) 0.011(5) -0.013(5) 
C6A 0.026(5) 0.034(5) 0.038(6) -0.002(4) 0.007(5) -0.005(4) 
C1B 0.021(5) 0.018(4) 0.029(5) -0.006(4) 0.010(4) -0.004(3) 
C2B 0.018(5) 0.039(5) 0.021(5) 0.000(4) 0.002(4) 0.000(4) 
C3B 0.020(5) 0.044(6) 0.035(6) 0.006(5) 0.004(4) 0.004(4) 
C4B 0.025(5) 0.047(6) 0.043(6) -0.005(5) 0.013(5) 0.008(5) 
C5B 0.038(6) 0.053(6) 0.031(6) -0.014(5) 0.016(5) 0.004(5) 
C6B 0.020(5) 0.040(5) 0.020(5) -0.004(4) -0.002(4) -0.002(4) 
C1C 0.016(5) 0.041(6) 0.034(5) 0.004(4) 0.002(4) 0.001(4) 
C2C 0.038(7) 0.105(11) 0.039(7) 0.000(7) 0.002(6) 0.035(7) 
C3C 0.042(8) 0.184(18) 0.056(9) -0.010(11) -0.003(7) 0.057(11) 
C4C 0.024(7) 0.168(18) 0.073(10) 0.012(11) 0.010(7) 0.022(9) 
C5C 0.037(7) 0.090(10) 0.051(8) 0.015(7) -0.018(6) -0.026(7) 
C6C 0.029(6) 0.048(6) 0.035(6) 0.004(5) -0.001(5) -0.016(5) 
C1D 0.022(5) 0.027(5) 0.014(4) -0.005(4) -0.001(4) 0.001(4) 
C2D 0.034(6) 0.031(5) 0.045(6) -0.001(5) 0.017(5) -0.005(4) 
C3D 0.055(8) 0.029(5) 0.047(7) -0.005(5) 0.016(6) -0.016(5) 
C4D 0.078(9) 0.024(5) 0.034(6) -0.005(5) 0.013(6) -0.001(5) 
C5D 0.051(7) 0.037(6) 0.022(5) 0.005(4) 0.013(5) 0.003(5) 
C6D 0.031(5) 0.026(5) 0.014(4) 0.001(4) 0.008(4) -0.002(4) 
Cl1 0.197(7) 0.285(10) 0.271(8) -0.082(7) 0.052(7) -0.038(7) 
Cl2 0.197(7) 0.285(10) 0.271(8) -0.082(7) 0.052(7) -0.038(7) 
  
_geom_special_details 
; 
 All esds (except the esd in the dihedral angle between two l.s. planes) 
 are estimated using the full covariance matrix.  The cell esds are taken 
 into account individually in the estimation of esds in distances, angles 
 and torsion angles; correlations between esds in cell parameters are only 
 used when they are defined by crystal symmetry.  An approximate (isotropic) 
 treatment of cell esds is used for estimating esds involving l.s. planes. 
; 
  
loop_ 
 _geom_bond_atom_site_label_1 
 _geom_bond_atom_site_label_2 
 _geom_bond_distance 
 _geom_bond_site_symmetry_2 
 _geom_bond_publ_flag 
Pt1 C1 2.048(10) . ? 
Pt1 P2 2.240(2) . ? 
Pt1 P1 2.333(2) . ? 
Pt1 Br1X 2.469(15) . ? 
Pt1 Br1 2.4707(10) . ? 
Fe1 C10 1.984(9) . ? 
Fe1 C5 2.004(9) . ? 
Fe1 C14 2.021(9) . ? 
Fe1 C9 2.021(8) . ? 
Fe1 C11 2.025(9) . ? 
Fe1 C13 2.036(9) . ? 
Fe1 C6 2.048(10) . ? 
Fe1 C8 2.049(9) . ? 
Fe1 C7 2.049(9) . ? 
Fe1 C12 2.063(10) . ? 
P1 C5 1.809(9) . ? 
P1 C1A 1.827(8) . ? 
P1 C1B 1.836(8) . ? 
P2 C10 1.808(9) . ? 
P2 C1C 1.818(9) . ? 
P2 C1D 1.818(9) . ? 
S1 Br1X 0.946(16) . ? 
S1 C4 1.721(14) . ? 
S1 C1 1.727(10) . ? 
C1 Br1X 0.802(14) . ? 
C1 C2 1.351(14) . ? 
C2 C3 1.402(15) . ? 
C2 Br1X 1.811(18) . ? 
C3 C4 1.347(18) . ? 
C3 Br1X 2.296(17) . ? 
C4 Br1X 2.054(18) . ? 
C5 C9 1.423(12) . ? 
C5 C6 1.447(12) . ? 
C6 C7 1.396(13) . ? 
C7 C8 1.426(13) . ? 
C8 C9 1.407(12) . ? 
C10 C11 1.415(12) . ? 
C10 C14 1.434(12) . ? 
C11 C12 1.410(13) . ? 
C12 C13 1.405(14) . ? 
C13 C14 1.377(14) . ? 
C1A C2A 1.384(12) . ? 
C1A C6A 1.390(13) . ? 
C2A C3A 1.389(13) . ? 
C3A C4A 1.346(16) . ? 
C4A C5A 1.370(15) . ? 
C5A C6A 1.385(14) . ? 
C1B C6B 1.392(12) . ? 
C1B C2B 1.395(12) . ? 
C2B C3B 1.368(13) . ? 
C3B C4B 1.376(14) . ? 
C4B C5B 1.386(14) . ? 
C5B C6B 1.385(13) . ? 
C1C C6C 1.384(14) . ? 
C1C C2C 1.385(15) . ? 
C2C C3C 1.402(17) . ? 
C3C C4C 1.35(2) . ? 
C4C C5C 1.41(2) . ? 
C5C C6C 1.392(16) . ? 
C1D C2D 1.380(13) . ? 
C1D C6D 1.383(12) . ? 
C2D C3D 1.382(14) . ? 
C3D C4D 1.374(17) . ? 
C4D C5D 1.359(16) . ? 
C5D C6D 1.402(13) . ? 
C1S Cl1 1.82(3) . ? 
C1S Cl2 1.83(3) . ? 
  
loop_ 
 _geom_angle_atom_site_label_1 
 _geom_angle_atom_site_label_2 
 _geom_angle_atom_site_label_3 
 _geom_angle 
 _geom_angle_site_symmetry_1 
 _geom_angle_site_symmetry_3 
 _geom_angle_publ_flag 
C1 Pt1 P2 88.6(3) . . ? 
C1 Pt1 P1 171.0(3) . . ? 
P2 Pt1 P1 100.36(8) . . ? 
C1 Pt1 Br1X 17.5(3) . . ? 
P2 Pt1 Br1X 91.5(3) . . ? 
P1 Pt1 Br1X 159.4(4) . . ? 
C1 Pt1 Br1 85.4(3) . . ? 
P2 Pt1 Br1 174.00(6) . . ? 
P1 Pt1 Br1 85.63(6) . . ? 
Br1X Pt1 Br1 82.7(3) . . ? 
C10 Fe1 C5 109.6(4) . . ? 
C10 Fe1 C14 41.9(4) . . ? 
C5 Fe1 C14 110.6(4) . . ? 
C10 Fe1 C9 110.1(3) . . ? 
C5 Fe1 C9 41.4(3) . . ? 
C14 Fe1 C9 139.5(4) . . ? 
C10 Fe1 C11 41.3(4) . . ? 
C5 Fe1 C11 138.9(4) . . ? 
C14 Fe1 C11 68.9(4) . . ? 
C9 Fe1 C11 111.3(4) . . ? 
C10 Fe1 C13 68.9(4) . . ? 
C5 Fe1 C13 138.6(4) . . ? 
C14 Fe1 C13 39.7(4) . . ? 
C9 Fe1 C13 179.0(4) . . ? 
C11 Fe1 C13 68.1(4) . . ? 
C10 Fe1 C6 138.8(4) . . ? 
C5 Fe1 C6 41.8(3) . . ? 
C14 Fe1 C6 110.7(4) . . ? 
C9 Fe1 C6 69.5(3) . . ? 
C11 Fe1 C6 179.2(4) . . ? 
C13 Fe1 C6 111.1(4) . . ? 
C10 Fe1 C8 138.9(4) . . ? 
C5 Fe1 C8 68.8(4) . . ? 
C14 Fe1 C8 179.0(4) . . ? 
C9 Fe1 C8 40.4(3) . . ? 
C11 Fe1 C8 112.1(4) . . ? 
C13 Fe1 C8 140.4(4) . . ? 
C6 Fe1 C8 68.4(4) . . ? 
C10 Fe1 C7 178.2(4) . . ? 
C5 Fe1 C7 68.6(4) . . ? 
C14 Fe1 C7 138.4(4) . . ? 
C9 Fe1 C7 68.5(4) . . ? 
C11 Fe1 C7 140.1(4) . . ? 
C13 Fe1 C7 112.5(4) . . ? 
C6 Fe1 C7 39.9(4) . . ? 
C8 Fe1 C7 40.7(4) . . ? 
C10 Fe1 C12 68.7(4) . . ? 
C5 Fe1 C12 178.0(4) . . ? 
C14 Fe1 C12 67.5(4) . . ? 
C9 Fe1 C12 139.8(4) . . ? 
C11 Fe1 C12 40.3(4) . . ? 
C13 Fe1 C12 40.1(4) . . ? 
C6 Fe1 C12 138.9(4) . . ? 
C8 Fe1 C12 113.2(4) . . ? 
C7 Fe1 C12 113.1(4) . . ? 
C5 P1 C1A 103.3(4) . . ? 
C5 P1 C1B 98.6(4) . . ? 
C1A P1 C1B 106.1(4) . . ? 
C5 P1 Pt1 123.0(3) . . ? 
C1A P1 Pt1 109.9(3) . . ? 
C1B P1 Pt1 114.2(3) . . ? 
C10 P2 C1C 101.2(4) . . ? 
C10 P2 C1D 104.3(4) . . ? 
C1C P2 C1D 104.4(4) . . ? 
C10 P2 Pt1 116.3(3) . . ? 
C1C P2 Pt1 115.3(3) . . ? 
C1D P2 Pt1 113.7(3) . . ? 
Br1X S1 C4 96.4(9) . . ? 
Br1X S1 C1 8.1(8) . . ? 
C4 S1 C1 93.6(6) . . ? 
Br1X C1 C2 111.9(14) . . ? 
Br1X C1 S1 9.6(9) . . ? 
C2 C1 S1 108.8(8) . . ? 
Br1X C1 Pt1 112.5(12) . . ? 
C2 C1 Pt1 135.2(9) . . ? 
S1 C1 Pt1 115.9(5) . . ? 
C1 C2 C3 114.2(11) . . ? 
C1 C2 Br1X 24.3(5) . . ? 
C3 C2 Br1X 90.3(9) . . ? 
C4 C3 C2 114.4(11) . . ? 
C4 C3 Br1X 62.4(8) . . ? 
C2 C3 Br1X 52.1(8) . . ? 
C3 C4 S1 109.0(9) . . ? 
C3 C4 Br1X 82.1(9) . . ? 
S1 C4 Br1X 27.2(4) . . ? 
C9 C5 C6 107.9(8) . . ? 
C9 C5 P1 123.5(7) . . ? 
C6 C5 P1 128.6(7) . . ? 
C9 C5 Fe1 69.9(5) . . ? 
C6 C5 Fe1 70.7(5) . . ? 
P1 C5 Fe1 124.7(5) . . ? 
C7 C6 C5 107.0(8) . . ? 
C7 C6 Fe1 70.1(5) . . ? 
C5 C6 Fe1 67.5(5) . . ? 
C6 C7 C8 109.3(8) . . ? 
C6 C7 Fe1 70.0(5) . . ? 
C8 C7 Fe1 69.6(5) . . ? 
C9 C8 C7 107.9(8) . . ? 
C9 C8 Fe1 68.7(5) . . ? 
C7 C8 Fe1 69.7(5) . . ? 
C8 C9 C5 108.0(8) . . ? 
C8 C9 Fe1 70.8(5) . . ? 
C5 C9 Fe1 68.7(5) . . ? 
C11 C10 C14 106.9(8) . . ? 
C11 C10 P2 127.6(7) . . ? 
C14 C10 P2 125.4(7) . . ? 
C11 C10 Fe1 70.9(5) . . ? 
C14 C10 Fe1 70.4(5) . . ? 
P2 C10 Fe1 126.0(4) . . ? 
C12 C11 C10 108.0(9) . . ? 
C12 C11 Fe1 71.3(6) . . ? 
C10 C11 Fe1 67.8(5) . . ? 
C13 C12 C11 107.7(9) . . ? 
C13 C12 Fe1 68.9(6) . . ? 
C11 C12 Fe1 68.4(5) . . ? 
C14 C13 C12 109.2(9) . . ? 
C14 C13 Fe1 69.6(5) . . ? 
C12 C13 Fe1 71.0(5) . . ? 
C13 C14 C10 108.1(8) . . ? 
C13 C14 Fe1 70.8(6) . . ? 
C10 C14 Fe1 67.7(5) . . ? 
C2A C1A C6A 119.1(8) . . ? 
C2A C1A P1 118.8(7) . . ? 
C6A C1A P1 122.0(7) . . ? 
C1A C2A C3A 119.6(9) . . ? 
C4A C3A C2A 120.8(10) . . ? 
C3A C4A C5A 120.4(9) . . ? 
C4A C5A C6A 120.1(10) . . ? 
C5A C6A C1A 119.8(9) . . ? 
C6B C1B C2B 119.5(8) . . ? 
C6B C1B P1 121.0(7) . . ? 
C2B C1B P1 119.4(7) . . ? 
C3B C2B C1B 120.3(9) . . ? 
C2B C3B C4B 120.6(9) . . ? 
C3B C4B C5B 119.8(9) . . ? 
C6B C5B C4B 120.4(9) . . ? 
C5B C6B C1B 119.4(9) . . ? 
C6C C1C C2C 119.5(10) . . ? 
C6C C1C P2 120.2(8) . . ? 
C2C C1C P2 120.2(8) . . ? 
C1C C2C C3C 121.5(12) . . ? 
C4C C3C C2C 118.4(15) . . ? 
C3C C4C C5C 121.6(13) . . ? 
C6C C5C C4C 119.2(12) . . ? 
C1C C6C C5C 119.7(12) . . ? 
C2D C1D C6D 119.4(8) . . ? 
C2D C1D P2 121.3(7) . . ? 
C6D C1D P2 119.3(7) . . ? 
C1D C2D C3D 120.7(10) . . ? 
C4D C3D C2D 118.9(10) . . ? 
C5D C4D C3D 122.0(10) . . ? 
C4D C5D C6D 118.8(10) . . ? 
C1D C6D C5D 120.0(9) . . ? 
C1 Br1X S1 162.3(17) . . ? 
C1 Br1X C2 43.8(10) . . ? 
S1 Br1X C2 128.7(11) . . ? 
C1 Br1X C4 116.1(13) . . ? 
S1 Br1X C4 56.4(8) . . ? 
C2 Br1X C4 73.2(7) . . ? 
C1 Br1X C3 81.1(12) . . ? 
S1 Br1X C3 91.7(9) . . ? 
C2 Br1X C3 37.7(5) . . ? 
C4 Br1X C3 35.5(5) . . ? 
C1 Br1X Pt1 50.0(10) . . ? 
S1 Br1X Pt1 134.6(10) . . ? 
C2 Br1X Pt1 93.7(8) . . ? 
C4 Br1X Pt1 165.1(9) . . ? 
C3 Br1X Pt1 131.2(8) . . ? 
Cl1 C1S Cl2 92.1(17) . . ? 
  
_diffrn_measured_fraction_theta_max    0.998 
_diffrn_reflns_theta_full              25.00 
_diffrn_measured_fraction_theta_full   0.998 
_refine_diff_density_max    2.634 
_refine_diff_density_min   -2.055 
_refine_diff_density_rms    0.194 
